# Supplementary material for: Adverse Outcomes to Early Middle Age Linked With Childhood Residential Mobility
Source: PubMed Central journal article supplement — Am J Prev Med. 2016 Sep;51(3):291–300. doi: 10.1016/j.amepre.2016.04.011 (PMC4982753; doi:10.1016/j.amepre.2016.04.011), 2016-09
Supplement: mmc1.pdf [file mmc1.pdf]

## **1. Clarification of Age Scales**

Two age scales were applied in this cohort study. The exposure variables measured the number of residential changes in each age-year (0-14 years) from birth to 15th birthday. These were measured prior to initiation of follow-up and were treated as time-fixed variables. However, age during follow-up from 15th birthday and up to early middle age (early 40s) was treated as a time-dependent variable; thus as time progressed during follow-up cohort members' ages increased. Therefore age during follow-up was treated as a time-dependent variable.

## **2. Frequency of Residential Relocations in the Cohort by Age at Exposure**

**Appendix Figure 1.** Frequency of residential mobility in the whole Danish population for each age-year of childhood.

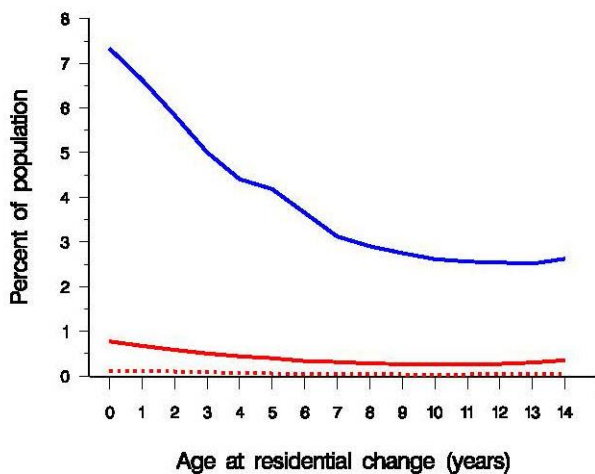

*Note:* Blue line = single residential move in an age-year of childhood; Full red line = two residential moves in a year; Broken red line = 3 or more residential moves in a year.

### **3. Gender Differences in Incidence Rate Ratios**

For all six adverse outcomes examined the patterns of association were generally similar for males and females, but for some outcomes the strength of association varied by gender. To formally assess this variation, interaction terms were fitted and gender-specific IRRs estimated for exposure to at least one residential move at age 14. This age at exposure was selected because the observed strength of association was greatest in relation to this period for all six outcomes. These results are shown in Appendix Table 1. For any psychiatric disorder ( $p < 0.0001$ ) the association was significantly stronger in males than in females, and vice versa for substance misuse ( $p = 0.044$ ) and for violent offending ( $p < 0.0001$ ). The elevation in risk of violent offending was markedly greater in females (IRR 5.27, 95% CI 4.85-5.71) than in males (IRR 3.26, 95% CI 3.15-3.38). There was no evidence of effect modification by cohort members' gender for risks of attempted suicide, natural death, or unnatural death.

**Appendix Table 1.** Gender-Specific IRRs With at Least One Residential Move at Age 14 Years

| <b>Adverse outcome</b> | <b>Cases (n)</b> | <b>IRR (95% CI):<br/>All persons</b> | <b>IRR (95% CI):<br/>Males</b> | <b>IRR (95% CI):<br/>Females</b> | <b>Interaction<br/><i>p</i>-value</b> |
|------------------------|------------------|--------------------------------------|--------------------------------|----------------------------------|---------------------------------------|
| Attempted suicide      | 36,742           | 2.96 (2.85-3.08)                     | 3.01 (2.84-3.18)               | 2.92 (2.78-3.08)                 | 0.455                                 |
| Violent offending      | 44,482           | 3.48 (3.37-3.59)                     | 3.26 (3.15-3.38)               | 5.27 (4.85-5.71)                 | <b>&lt;0.0001</b>                     |
| Any mental illness     | 135,015          | 2.26 (2.21-2.32)                     | 2.55 (2.46-2.64)               | 2.07 (2.01-2.14)                 | <b>&lt;0.0001</b>                     |
| Substance misuse       | 24,935           | 3.77 (3.62-3.93)                     | 3.66 (3.48-3.85)               | 4.02 (3.73-4.32)                 | <b>0.044</b>                          |
| Unnatural death        | 5224             | 2.56 (2.30-2.85)                     | 2.64 (2.34-2.96)               | 2.27 (1.74-2.90)                 | 0.283                                 |
| Natural death          | 3935             | 1.59 (1.36-1.84)                     | 1.60 (1.31-1.94)               | 1.57 (1.22-1.98)                 | 0.879                                 |

*Note:* Boldface indicates statistical significance ( $p < 0.05$ )  
 IRR, incidence rate ratio

Thus, some gender differences in strengths of association were found. In particular, among those individuals exposed to residential relocation at age 14, there was a greater elevation in risk of subsequent violent offending among females than males. One can only speculate as to why this may be so. Perhaps young females who have been moved by their parents against their wishes

feel especially angered by the loss of existing friendships and peer support, and are then prone to expressing their consequent resentment in violent and aggressive ways. It could also be that some parents are more likely to move the family home because of an aggressive daughter than an aggressive son, in an attempt to shift them towards a less disruptive peer group. We adjusted the estimates linked with residential relocation at age 14 by aggregate number of prior moves through ages 0-13. The stronger association with violent offending in females versus males persisted ( $p < 0.0001$ ), although the ratio between the two gender-specific IRRs was smaller with this adjustment (female IRR 3.41, 95% CI 3.11-3.72; male IRR 2.38, 95% CI 2.30-2.47). It should, however, also be noted that the absolute risk of violent offending was much greater in males exposed to residential mobility in childhood than in similarly exposed females.

#### **4. Detailed Exploration of Stratification by Parental SES**

Please also refer to Figure 4 in the main text of the manuscript for interpretation of the additional results presented in this subsection. Appendix Table 2 presents interaction tests with parental SES strata specific to each age-year exposure period. With multiple significance testing accounted for using the Bonferroni correction<sup>43</sup> most of these interaction tests were significant with exposure at age 6 and younger, and almost none were significant for exposure at age 7 and older. This confirms that the patterns of association were homogeneous across the three parental SES strata if residential mobility occurred once children had commenced full-time education, with significant evidence of heterogeneity in relation to relocations that occurred during infancy and the early childhood years. As Figure 4 illustrates, the pattern of risk observed in the higher parental SES stratum was somewhat different from those seen in the middle and lower strata in this regard.

**Appendix Table 2.** Interaction Tests for Parental SES Stratification by Age at Exposure for Attempted Suicide and Violent Offending

| Age-years of childhood | Attempted suicide:<br><i>p</i> -value for SES interaction | Violent offending:<br><i>p</i> -value for SES interaction |
|------------------------|-----------------------------------------------------------|-----------------------------------------------------------|
| 0                      | <b>0.0006</b>                                             | 0.056                                                     |
| 1                      | <b>&lt;0.0001</b>                                         | 0.015                                                     |
| 2                      | <b>&lt;0.0001</b>                                         | <b>0.002</b>                                              |
| 3                      | 0.011                                                     | 0.005                                                     |
| 4                      | <b>&lt;0.0001</b>                                         | <b>0.001</b>                                              |
| 5                      | <b>0.0031</b>                                             | <b>0.0002</b>                                             |
| 6                      | <b>0.0004</b>                                             | <b>&lt;0.0001</b>                                         |
| 7                      | 0.135                                                     | 0.471                                                     |
| 8                      | 0.027                                                     | 0.039                                                     |
| 9                      | 0.040                                                     | 0.620                                                     |
| 10                     | 0.535                                                     | 0.005                                                     |
| 11                     | 0.128                                                     | 0.140                                                     |
| 12                     | <b>0.0002</b>                                             | 0.447                                                     |
| 13                     | 0.027                                                     | 0.348                                                     |
| 14                     | 0.247                                                     | 0.796                                                     |

*Note:* Boldface indicates statistical significance ( $p < 0.0033$ , i.e., Bonferroni-corrected significance level: 0.05/15)

## **5. Total Number of Residential Relocations During Upbringing From Birth to 15th Birthday**

Across all six adverse outcomes considered, the highest risks were among the small subgroup of cohort members who moved 9 or 10 or more times (Appendix Table 3). The much larger group that moved just once, mostly during infancy or early childhood, had modestly elevated risks. A ‘dose-response’ relationship is indicated, with the table’s bottom row reporting trend statistics indicating the incremental increase in the IRR value with each successive move assuming a log-linear association between number of relocations and the IRR. Appendix Table 4 shows how these risk gradients were attenuated, but not entirely effaced, with adjustment for the full set of confounders assessed in this study. The particularly marked elevations in risk associated with residential relocation during early/mid-adolescence may to some degree be partially influenced by the frequency of previous moves during early and middle childhood.

**Appendix**  
**Adverse Outcomes to Early Middle Age Linked With Childhood Residential Mobility**  
**Webb et al.**

**Appendix Table 3.** Incidence Rate Ratios (and their 95% CIs) Linked With Total Number of Residential Moves

| Categorical model  | % of cohort | Violent offending | Attempted suicide | Any psychiatric disorder | Substance misuse disorder | Unnatural death  | Natural death    |
|--------------------|-------------|-------------------|-------------------|--------------------------|---------------------------|------------------|------------------|
| 0                  | 63.0        | 1.00 (ref.)       | 1.00 (ref.)       | 1.00 (ref.)              | 1.00 (ref.)               | 1.00 (ref.)      | 1.00 (ref.)      |
| 1                  | 19.8        | 1.19 (1.16-1.22)  | 1.21 (1.18-1.24)  | 1.22 (1.20-1.23)         | 1.32 (1.27-1.36)          | 1.10 (1.02-1.18) | 1.11 (1.03-1.20) |
| 2                  | 9.3         | 1.82 (1.77-1.88)  | 1.74 (1.69-1.80)  | 1.58 (1.55-1.60)         | 2.08 (2.00-2.15)          | 1.44 (1.32-1.57) | 1.25 (1.13-1.38) |
| 3                  | 3.9         | 2.28 (2.20-2.37)  | 2.22 (2.13-2.31)  | 1.89 (1.85-1.94)         | 2.68 (2.56-2.82)          | 1.64 (1.46-1.84) | 1.31 (1.13-1.51) |
| 4                  | 1.9         | 3.08 (2.95-3.23)  | 2.71 (2.57-2.85)  | 2.23 (2.17-2.30)         | 3.41 (3.21-3.62)          | 2.17 (1.88-2.49) | 1.48 (1.22-1.77) |
| 5                  | 1.0         | 3.69 (3.48-3.90)  | 3.39 (3.17-3.62)  | 2.61 (2.51-2.71)         | 4.23 (3.93-4.55)          | 2.12 (1.73-2.57) | 1.38 (1.04-1.79) |
| 6                  | 0.5         | 4.29 (3.99-4.62)  | 3.99 (3.67-4.34)  | 2.80 (2.66-2.95)         | 4.78 (4.34-5.25)          | 3.16 (2.51-3.93) | 2.03 (1.47-2.72) |
| 7                  | 0.3         | 4.86 (4.41-5.33)  | 4.19 (3.74-4.68)  | 3.12 (2.91-3.34)         | 5.33 (4.70-6.01)          | 3.40 (2.49-4.50) | 1.79 (1.10-2.73) |
| 8                  | 0.2         | 6.16 (5.47-6.90)  | 4.81 (4.18-5.50)  | 3.27 (2.99-3.57)         | 6.10 (5.21-7.10)          | 2.99 (1.91-4.43) | 1.83 (0.95-3.14) |
| 9                  | 0.1         | 6.93 (5.95-8.01)  | 5.62 (4.73-6.61)  | 3.52 (3.15-3.93)         | 6.79 (5.54-8.22)          | 4.04 (2.36-6.36) | 3.59 (1.92-6.03) |
| 10 or more         | 0.1         | 6.33 (5.56-7.16)  | 5.63 (4.87-6.46)  | 3.84 (3.50-4.21)         | 6.75 (5.71-7.92)          | 4.49 (3.00-6.42) | 3.05 (1.75-4.87) |
| Trend <sup>a</sup> | -           | 1.27 (1.27-1.28)  | 1.25 (1.24-1.25)  | 1.19 (1.19-1.20)         | 1.29 (1.28-1.30)          | 1.18 (1.17-1.20) | 1.10 (1.08-1.13) |

*Note:* All IRR estimates adjusted for gender, age and calendar year period

<sup>a</sup> Summary estimate of the incremental increase in the IRR value with each residential relocation assuming a log-linear association between total number of moves and the IRR  
 IRR, incidence rate ratio

**Appendix**  
**Adverse Outcomes to Early Middle Age Linked With Childhood Residential Mobility**  
**Webb et al.**

**Appendix Table 4.** Fully Adjusted Incidence Rate Ratios (and Their 95% CIs) Linked With Total Number of Residential Moves

| Categorical model | % of cohort | Violent offending | Attempted suicide | Any psychiatric disorder | Substance misuse disorder | Unnatural death  | Natural death    |
|-------------------|-------------|-------------------|-------------------|--------------------------|---------------------------|------------------|------------------|
| 0                 | 63.0        | 1.00 (ref.)       | 1.00 (ref.)       | 1.00 (ref.)              | 1.00 (ref.)               | 1.00 (ref.)      | 1.00 (ref.)      |
| 1                 | 19.8        | 1.11 (1.08-1.14)  | 1.18 (1.14-1.21)  | 1.14 (1.12-1.16)         | 1.20 (1.15-1.24)          | 1.15 (1.07-1.24) | 1.12 (1.03-1.22) |
| 2                 | 9.3         | 1.40 (1.36-1.44)  | 1.41 (1.37-1.46)  | 1.31 (1.28-1.33)         | 1.55 (1.49-1.61)          | 1.34 (1.23-1.47) | 1.18 (1.06-1.31) |
| 3                 | 3.9         | 1.50 (1.44-1.55)  | 1.58 (1.51-1.64)  | 1.41 (1.38-1.45)         | 1.71 (1.63-1.80)          | 1.39 (1.23-1.57) | 1.16 (1.00-1.34) |
| 4                 | 1.9         | 1.73 (1.65-1.82)  | 1.68 (1.59-1.77)  | 1.50 (1.46-1.55)         | 1.86 (1.75-1.98)          | 1.65 (1.42-1.90) | 1.22 (1.00-1.47) |
| 5                 | 1.0         | 1.81 (1.70-1.92)  | 1.85 (1.73-1.98)  | 1.60 (1.53-1.66)         | 2.02 (1.87-2.18)          | 1.46 (1.19-1.78) | 1.06 (0.80-1.38) |
| 6                 | 0.5         | 1.92 (1.78-2.07)  | 1.99 (1.82-2.16)  | 1.59 (1.50-1.67)         | 2.07 (1.88-2.28)          | 2.05 (1.62-2.56) | 1.49 (1.07-2.00) |
| 7                 | 0.3         | 1.96 (1.78-2.15)  | 1.92 (1.71-2.14)  | 1.66 (1.55-1.78)         | 2.11 (1.86-2.39)          | 2.05 (1.50-2.73) | 1.25 (0.77-1.92) |
| 8                 | 0.2         | 2.31 (2.05-2.59)  | 2.05 (1.78-2.35)  | 1.65 (1.51-1.80)         | 2.20 (1.88-2.57)          | 1.70 (1.08-2.52) | 1.22 (0.63-2.10) |
| 9                 | 0.1         | 2.54 (2.18-2.94)  | 2.31 (1.94-2.73)  | 1.72 (1.54-1.92)         | 2.45 (1.99-2.97)          | 2.23 (1.30-3.52) | 2.33 (1.24-3.94) |
| 10 or more        | 0.1         | 2.10 (1.85-2.38)  | 2.12 (1.83-2.44)  | 1.74 (1.58-1.91)         | 2.19 (1.85-2.58)          | 2.26 (1.50-3.24) | 1.87 (1.07-3.01) |

*Note:* All IRR estimates adjusted for gender, age and calendar year period, parental age at birth, urbanization, history of any mental illness in parent or sibling, parental SES.

IRR, incidence rate ratio

## **References**

1. Stubblefield RL. Children's emotional problems aggravated by family moves. *Am J Orthopsychiatry*. 1955;25(1):120–126. <http://dx.doi.org/10.1111/j.1939-0025.1955.tb00122.x>.
2. U.S. Census Bureau. Geographical Mobility: 2014 to 2015. [www.census.gov/hhes/migration/](http://www.census.gov/hhes/migration/). Updated November 2015; Published February 2016. Accessed February 29, 2016.
3. Jolleyman T, Spencer N. Residential mobility in childhood and health outcomes: a systematic review. *J Epidemiol Community Health*. 2008;62(7):584–592. <http://dx.doi.org/10.1136/jech.2007.060103>.
4. Paksarian D, Eaton WW, Mortensen PB, Pedersen CB. Childhood residential mobility, schizophrenia, and bipolar disorder: a population-based study in Denmark. *Schizophr Bull*. 2015;41(2):346–354. <http://dx.doi.org/10.1093/schbul/sbu074>.
5. Dong M, Anda RF, Felitti VJ, et al. Childhood residential mobility and multiple health risks during adolescence and adulthood: the hidden role of adverse childhood experiences. *Arch Pediatr Adolesc Med*. 2005;159(12):1104–1110. <http://dx.doi.org/10.1001/archpedi.159.12.1104>.
6. Scanlon E, Devine K. Residential mobility and youth well-being: research, policy, and practice issues. *J Sociol Soc Welfare*. 2001;28(1):119–137.
7. Hagan J, MacMillan R, Wheaton B. New kid in town: social capital and the life course effects of family migration on children. *Am Sociol Rev*. 1996;61(June):368–385. <http://dx.doi.org/10.2307/2096354>.

**Appendix**  
**Adverse Outcomes to Early Middle Age Linked With Childhood Residential Mobility**  
**Webb et al.**

8. Gasper J, DeLuca S, Estacion A. Coming and going: explaining the effects of residential and school mobility on adolescent delinquency. *Soc Sci Res.* 2010;39(3):459–476.  
<http://dx.doi.org/10.1016/j.ssresearch.2009.08.009>.
9. Pribesh S, Downey DB. Why are residential and school moves associated with poor school performance? *Demography.* 1999;36(4):521–534. <http://dx.doi.org/10.2307/2648088>.
10. Dong M, Anda RF, Felitti VJ, et al. The interrelatedness of multiple forms of childhood abuse, neglect, and household dysfunction. *Child Abuse Negl.* 2004;28(7):771–784.  
<http://dx.doi.org/10.1016/j.chiabu.2004.01.008>.
11. Brown D, Benzeval M, Gayle V, Macintyre S, O’Reilly D, Leyland AH. Childhood residential mobility and health in late adolescence and adulthood: findings from the West of Scotland Twenty-07 Study. *J Epidemiol Community Health.* 2012;66(10):942–950.  
<http://dx.doi.org/10.1136/jech-2011-200316>.
12. Pettit B. Moving and children’s social connections: neighborhood context and the consequences of moving for low-income families. *Sociol Forum.* 2004;19(2):285–311.  
<http://dx.doi.org/10.1023/B:SOFO.0000031983.93817.ff>.
13. Adam EK, Chase-Landsdale PL. Home sweet home(s): parental separations, residential moves, and adjustment problems in low-income adolescent girls. *Dev Psychol.* 2002;38(5):792–805. <http://dx.doi.org/10.1037/0012-1649.38.5.792>.
14. WHO Regional Office for Europe. Violence and Injuries. [www.euro.who.int/en/health-topics/disease-prevention/violence-and-injuries/violence-and-injuries](http://www.euro.who.int/en/health-topics/disease-prevention/violence-and-injuries/violence-and-injuries). Accessed February 29, 2016.
15. Pedersen CB, Gøtzsche H, Møller JO, Mortensen PB. The Danish Civil Registration System. A cohort of eight million persons. *Dan Med Bull.* 2006;53(4):441–449.



16. Jensen MF, Greve V, Høyer G, Spencer M. *The Principal Danish Criminal Acts*. 3rd ed. Copenhagen: DJØF Publishing; 2006.
17. Mors O, Perto GP, Mortensen PB. The Danish Psychiatric Central Research Register. *Scand J Public Health*. 2011;39(7)(suppl):54–57. <http://dx.doi.org/10.1177/1403494810395825>.
18. Lynge E, Sandegaard JL, Rebolj M. The Danish National Patient Register. *Scand J Public Health*. 2011;39(7)(suppl):30–33. <http://dx.doi.org/10.1177/1403494811401482>.
19. Nordentoft M, Mortensen PB, Pedersen PB. Absolute risk of suicide after first hospital contact in mental disorder. *Arch Gen Psychiatry*. 2011;68(10):1058–1064. <http://dx.doi.org/10.1001/archgenpsychiatry.2011.113>.
20. WHO. *Classification of Diseases: Extended Danish-Latin Version of the World Health Organization International Classification of Diseases, 8th Revision, 1965*. Copenhagen: Danish National Board of Health; 1971.
21. WHO. *The ICD-10 Classification of Mental and Behavioural Disorders: Diagnostic Criteria for Research*. Geneva: WHO; 1993.
22. Juel K, Helweg-Larsen K. The Danish registers of causes of death. *Dan Med Bull*. 1999;46(4):354–357.
23. Danmarks Statistik. *IDA—en Integret Database for Arbejdsmarkedsforskning*. Copenhagen: Danmarks Statistiks trykkeri; 1991.
24. Laird N, Olivier D. Covariance analysis of censored survival data using log-linear analysis techniques. *J Am Stat Assoc*. 1981;76(374):231–240. <http://dx.doi.org/10.1080/01621459.1981.10477634>.
25. Breslow NE, Day NE. *Statistical Methods in Cancer Research Volume II—The Design and Analysis of Cohort Studies*. Lyon, France: IARC Scientific Publications No. 82; 1987.

26. Clayton D, Hills M. *Statistical Models in Epidemiology*. Oxford: Oxford University Press; 1993.
27. Andersen P, Borgen O, Gill R, Kieding N. *Statistical Models Based on Counting Processes*. Corrected 1st ed. New York: Springer-Verlag; 1997.
28. Rothman J, Greenland S. *Modern Epidemiology*. 2nd ed. Philadelphia: Lippincott-Raven; 1998.
29. Carstensen B. Demography and epidemiology: Practical use of the Lexus diagram in the computer age. Who needs the Cox-model anyway? Paper presented at: the Annual Meeting of the Finnish Statistical Society; May 23–24, 2005; Oulu, Finland.  
<http://publichealth.ku.dk/sections/biostatistics/reports/2006/rr-06-2.pdf/>. Revised December 2005. [Accessed February 29, 2016](#).
30. Carstensen B. Example and programs for splitting follow-up time in cohort studies. Institute of Public Health, University of Copenhagen, 2007. <http://staff.pubhealth.ku.dk/~bxc/Lexis/>.  
[Accessed February 29, 2016](#).
31. Macaluso M. Exact stratification of person-years. *Epidemiology*. 1992;3(5):441–448.  
<http://dx.doi.org/10.1097/00001648-199209000-00010>.
32. Pedersen CB. No evidence of time trends in the urban-rural differences in schizophrenia risk among five million people born in Demark from 1910 to 1986. *Psychol Med*. 2006;36(2):211–219. <http://dx.doi.org/10.1017/S003329170500663X>.
33. Haynie DL, South SJ. Residential mobility and adolescent violence. *Soc Forces*. 2005;84(1):361–374. <http://dx.doi.org/10.1353/sof.2005.0104>.
34. Singh SP, Winsper C, Wolke D, Bryson A. School mobility and prospective pathways to psychotic-like symptoms in early adolescence: a prospective birth cohort study. *J Am Acad*

*Child Adolesc Psychiatry*. 2014;53(5):518–527.

<http://dx.doi.org/10.1016/j.jaac.2014.01.016>.

35. Millegan J, McLay R, Engel C. The effect of geographic moves on mental healthcare utilization in children. *J Adolesc Health*. 2014;55(2):276–280.  
<http://dx.doi.org/10.1016/j.jadohealth.2014.01.009>.
36. Juon HS, Ensminger ME, Feehan M. Childhood adversity and later mortality in an urban African American cohort. *Am J Public Health*. 2003;93(12):2044–2046.  
<http://dx.doi.org/10.2105/AJPH.93.12.2044>.
37. Astone NM, McLanahan SS. Family structure, residential mobility, and school dropout: a research note. *Demography*. 1994;31(4):575–584. <http://dx.doi.org/10.2307/2061791>.
38. Boynton-Jarrett R, Hair E, Zuckerman B. Turbulent times: effects of turbulence and violence exposure in adolescence on high school completion, health risk behavior, and mental health in young adulthood. *Soc Sci Med*. 2013;95:77–86.  
<http://dx.doi.org/10.1016/j.socscimed.2012.09.007>.
39. Brown AC, Orthner DK. Relocation and personal well-being among early adolescents. *J Early Adolesc*. 1990;10(3):366–381. <http://dx.doi.org/10.1177/0272431690103008>.
40. Mortensen PB, Allebeck P, Munk-Jørgensen P. Population-based registers in psychiatric research. *Nord J Psychiatry*. 1996;50(suppl 36):67–72.  
<http://dx.doi.org/10.3109/08039489609104316>.
41. Maselko J, Hayward RD, Hanlon A, Buka S, Meador K. Religious service attendance and major depression: a case of reverse causality? *Am J Epidemiol*. 2012;175(6):576–583.  
<http://dx.doi.org/10.1093/aje/kwr349>.

42. Bramson LM, Rickert ME, Class QA, et al. The association between childhood relocations and subsequent risk of suicide attempt, psychiatric problems, and low academic achievement. *Psychol Med.* 2016;46(5):969–979.  
<http://dx.doi.org/10.1017/S0033291715002469>.
43. Bland JM, Altman DG. Multiple significance tests: the Bonferroni method. *BMJ.* 1995;310(6973):170. <http://dx.doi.org/10.1136/bmj.310.6973.170>.
